# Supplementary material for: Genetic screens reveal a central role for heme metabolism in artemisinin susceptibility
Source: PubMed Central journal article supplement (PMC7511413; doi:10.1038/s41467-020-18624-0), 2020-09-23
Supplement: 41467_2020_18624_MOESM1_ESM.pdf [file 41467_2020_18624_MOESM1_ESM.pdf]

## SUPPLEMENTARY INFORMATION

### **Genetic screens reveal a central role for heme metabolism in artemisinin susceptibility**

Clare R. Harding<sup>1,2,8</sup>, Saima M. Sidik<sup>1,8</sup>, Boryana Petrova<sup>1,8</sup>, Nina F. Gnädig<sup>3</sup>, John Okombo<sup>3</sup>, Alice L. Herneisen<sup>1</sup>, Kurt E. Ward<sup>3,4</sup>, Benedikt M. Markus<sup>1,5</sup>, Elizabeth A. Boydston<sup>1</sup>, David A. Fidock<sup>3,6</sup>, Sebastian Lourido<sup>1,7\*</sup>

<sup>1</sup> Whitehead Institute for Biomedical Research, Cambridge, MA, USA

<sup>2</sup> Wellcome Centre for Molecular Parasitology, Institute of Infection, Immunity & Inflammation, University of Glasgow, Glasgow, UK

<sup>3</sup> Department of Microbiology and Immunology, Columbia University Irving Medical Center, New York, NY, USA

<sup>4</sup> Department of Microbiology and Immunology, University of Otago, Dunedin, New Zealand

<sup>5</sup> University of Freiburg, Faculty of Biology, Freiburg, Germany

<sup>6</sup> Division of Infectious Diseases, Department of Medicine, Columbia University Irving Medical Center, New York, NY, USA

<sup>7</sup> Biology Department, Massachusetts Institute of Technology, Cambridge, MA, USA

<sup>8</sup> These authors contributed equally to the work

\* Correspondence: [lourido@wi.mit.edu](mailto:lourido@wi.mit.edu)

## SUPPLEMENTARY FIGURES & LEGENDS

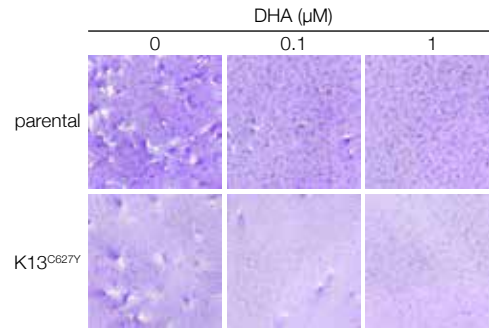

**Supplementary Figure 1 | K13<sup>C627Y</sup> parasites proliferate normally and do not show DHA resistance in plaque assays.** Plaque assay of parental and K13<sup>C627Y</sup> parasites, fixed after 7 days of drug treatment with the indicated concentration.

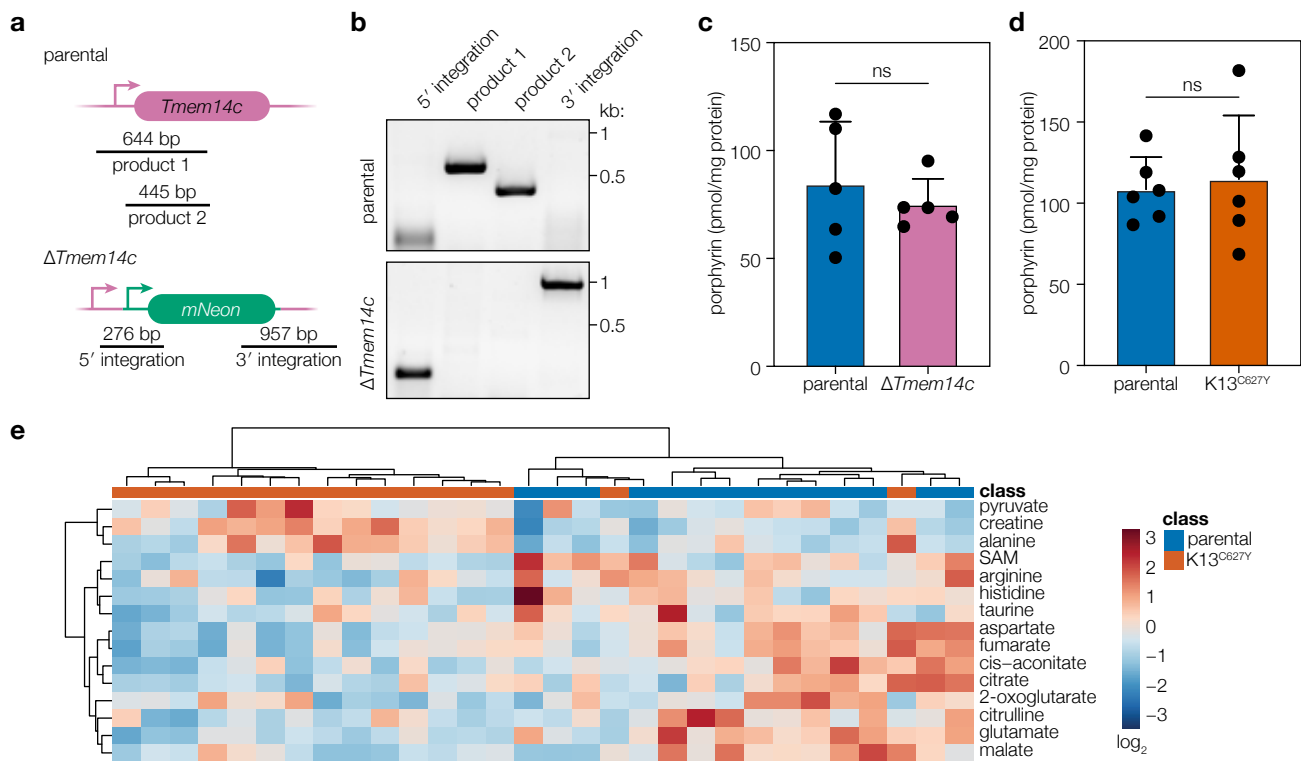

**Supplementary Figure 2 | Construction of  $\Delta Tmem14c$  and porphyrin measurements from  $\Delta Tmem14c$  and K13<sup>C627Y</sup>.** **a**, Schematic showing strategy for creating  $\Delta Tmem14c$  parasites. The coding sequence was replaced by an mNeonGreen cassette. **b**, PCR demonstrating correct deletion of *Tmem14c*. **c**, Total porphyrins were quantified from parental and  $\Delta Tmem14c$  parasites. Results are mean  $\pm$  SD for  $n = 3$  independent experiments, each performed in technical duplicate. **d**, Total porphyrins were quantified from parental and K13<sup>C627Y</sup> parasites. Results are mean  $\pm$  SD for  $n = 3$  independent experiments; ns, not significant by two-tailed, unpaired t test. **e**, MetaboAnalyst heatmap analysis of top 15 changed polar metabolites between parental and K13<sup>C627Y</sup> parasites from 4 independent experiments. Metabolite peak areas were normalized to total metabolite signal (see **Methods**).

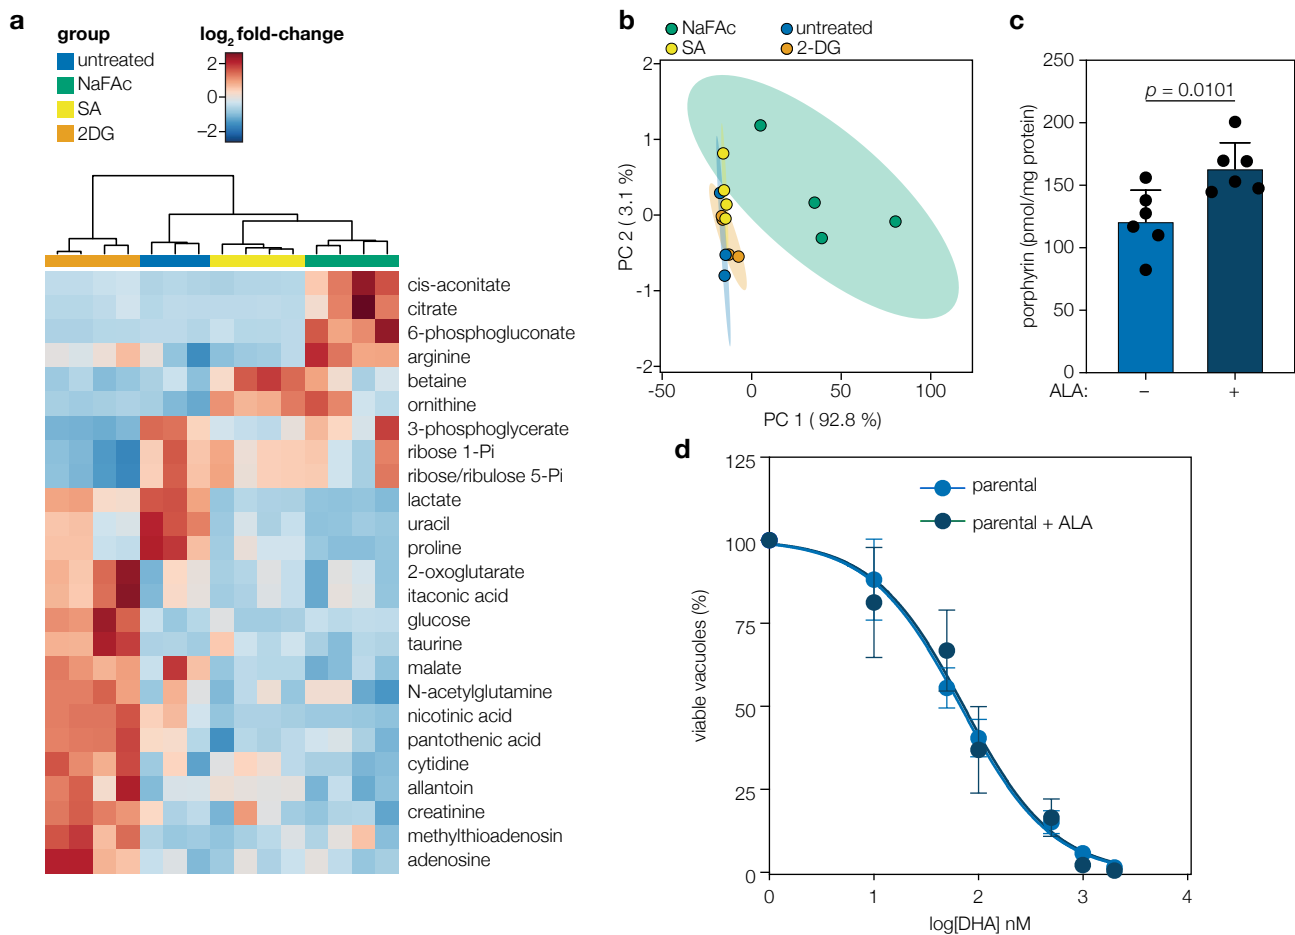

**Supplementary Figure 3 | Effects of modulators of glycolysis, TCA, and heme biosynthesis on parasite metabolism.** **a**, MetaboAnalyst heatmap analysis of the top 25 polar metabolites with altered abundance after the indicated treatment. Results are from a representative experiment performed in triplicate. Metabolite peak areas were normalized to total metabolite signal (see **Methods**). **b**, PCA plot indicating variance of total polar metabolites between various compound-treated samples. 500 mM NaFAC treatment had significant global effects on metabolite abundance, while 5 mM 2-DG and 10 mM SA had more subtle effects and overlapped with the parental, untreated line. **c**, Normalized total porphyrin levels in untreated or 200  $\mu$ M ALA treated parasites. Results are mean  $\pm$  SD of  $n = 3$  independent experiments performed in duplicate;  $p$  values from two-tailed, unpaired t test on raw values. **d**, Dose-response curve for parasites treated with ALA or vehicle. No difference in the response to DHA could be seen (extra-sum-of-squares F test,  $p = 0.79$ ). Results are mean  $\pm$  SEM for  $n = 3$  biological replicates.

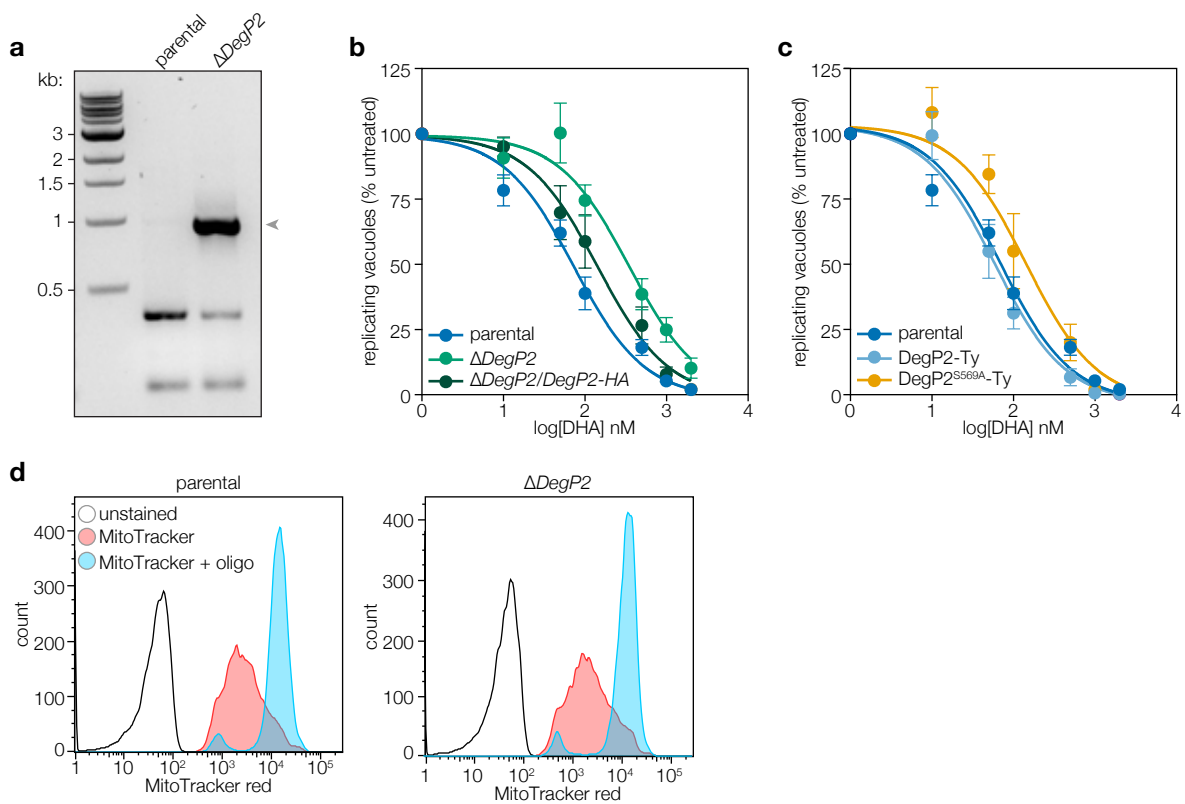

**Supplementary Figure 4 | DegP2-deficient parasites are less susceptible to DHA but have normal mitochondrial polarization.** **a**, PCR confirming loss of the endogenous locus and replacement with YFP. Arrow indicates the size of the PCR product expected after replacement. **b**, DHA dose-response curves. Results are mean  $\pm$  SEM for  $n = 7, 7,$  or  $4$  independent experiments for the parental,  $\Delta DegP2$ , or  $\Delta DegP2/DegP2-HA$  strains, respectively. **c**, DHA dose-response curves. Results are mean  $\pm$  SEM for  $n = 7, 4,$  or  $4$  independent replicates for the parental, *DegP2-Ty*, or *DegP2<sup>S569A</sup>-Ty* strains, respectively. **d**, Histograms of flow cytometry data of MitoTracker-stained parental and  $\Delta DegP2$  parasites, treated with oligomycin or untreated. No differences were observed between parental and  $\Delta DegP2$  parasites. Results are representative of two independent experiments.

## SUPPLEMENTARY TABLES

**Supplementary Table 1.** Summary of EC<sub>50</sub> values.

| Strain                     | Compound | Pre-treatment         | Compound treatment duration (h) | Compound treatment time (h following invasion) | Intra/extracellular | EC <sub>50</sub> (nM) | 95% CI      | Figure     |
|----------------------------|----------|-----------------------|---------------------------------|------------------------------------------------|---------------------|-----------------------|-------------|------------|
| K13 <sup>C627Y</sup>       | DHA      |                       | 5                               |                                                | Extracellular       | 498                   | 321.2–628.3 | 1e         |
| parental                   | DHA      |                       | 5                               |                                                | Extracellular       | 70                    | 49.58–99.08 | 1e, 2d, 5d |
| K13 <sup>C627Y</sup>       | DHA      |                       | 5                               | 1–6                                            | Intracellular       | 1492                  | 797.8–2059  | 1f         |
| parental                   | DHA      |                       | 5                               | 1–6                                            | Intracellular       | 548.5                 | 372.3–772.6 | 1f, 2e     |
| K13 <sup>C627Y</sup>       | DHA      |                       | 5                               | 24–29                                          | Intracellular       | 1123                  | 885.3–1802  | 1f         |
| parental                   | DHA      |                       | 5                               | 24–29                                          | Intracellular       | 539.6                 | 450.1–708.7 | 1g, 2e     |
| $\Delta Tmem14c$           | DHA      |                       | 5                               |                                                | Extracellular       | 36.9                  | 27.44–49.37 | 2d         |
| $\Delta Tmem14c$           | DHA      |                       | 5                               | 1–6                                            | Intracellular       | 168                   | 99–330.5    | 2e         |
| $\Delta Tmem14c$           | DHA      |                       | 5                               | 24–29                                          | Intracellular       | 77.4                  | 66.79–89.32 | 2e         |
| parental                   | DHA      | 2 h 500 $\mu$ M NaFAc | 5                               |                                                | Extracellular       | 271.3                 | 174.7–417.5 | 3c         |
| parental                   | DHA      | 2 h 10 mM SA          | 5                               |                                                | Extracellular       | 529.9                 | 413.2–839.7 | 3d         |
| parental                   | DHA      | 2 h 5 mM 2-DG         | 5                               |                                                | Extracellular       | 86.46                 | 52.52–141.5 | 3e         |
| parental                   | DHA      | 2 h vehicle           | 5                               |                                                | Extracellular       | 76.15                 | 52.54–110.8 | 3c, 3d, 3e |
| parental                   | DHA      | 2 h 200 $\mu$ M ALA   | 5                               |                                                | Extracellular       | 81.61                 | 50.28–131.9 | S3d        |
| $\Delta DegP2$             | DHA      |                       | 5                               |                                                | Extracellular       | 357.8                 | 259.7–487.8 | 5d         |
| $\Delta DegP2/ DegP2-HA$   | DHA      |                       | 5                               |                                                | Extracellular       | 104.7                 | 95.46–207.3 | 5d         |
| DegP2-Ty                   | DHA      |                       | 5                               |                                                | Extracellular       | 63                    | 43.07–91.95 | 5d         |
| DegP2 <sup>S569A</sup> -Ty | DHA      |                       | 5                               |                                                | Extracellular       | 153.1                 | 105.7–222.4 | 5d         |
| $\Delta DegP2$             | TTFA     |                       | 5                               |                                                | Extracellular       | 411                   | 356–475     | 6c         |
| $\Delta DegP2/ DegP2-HA$   | TTFA     |                       | 5                               |                                                | Extracellular       | 264                   | 223–316     | 6c         |
| parental                   | TTFA     |                       | 5                               |                                                | Extracellular       | 255                   | 223–292     | 6c         |
| $\Delta DegP2$             | ATQ      |                       | 5                               |                                                | Extracellular       | 80                    | 49.62–130.6 | 6d         |
| parental                   | ATQ      |                       | 5                               |                                                | Extracellular       | 69                    | 43.32–112.1 | 6d         |

**Supplementary Table 2.** Summary of top hits from three replicates of the genome-wide screen. ns, not significantly enriched; <sup>a</sup>(Sidik, 2016).

| Gene ID      | Annotation                                      | Drug score |       |      | Phenotype score <sup>a</sup> |
|--------------|-------------------------------------------------|------------|-------|------|------------------------------|
|              |                                                 | Rep1       | Rep2  | Rep3 |                              |
| TGGT1_290840 | serine protease (DegP2)                         | 9.97       | 3.9   | 7.03 | -1.87                        |
| TGGT1_244200 | $\alpha$ -ketoglutarate dehydrogenase (E1)      | 13.15      | 10.97 | 5.03 | -4.8                         |
| TGGT1_219550 | $\alpha$ -ketoglutarate dehydrogenase (E2)      | 12.01      | 12.26 | 4.99 | -4.25                        |
| TGGT1_206470 | pyruvate dehydrogenase (PDH-E3II)               | 12.9       | 12.55 | 9.07 | -3.23                        |
| TGGT1_251680 | Translationally controlled tumor protein (TCTP) | ns         | 2.65  | 3.24 | -1.37                        |
| TGGT1_297080 | pyridoxal kinase                                | 5.63       | ns    | 5.01 | -0.41                        |
| TGGT1_272490 | protoporphyrinogen oxidase                      | 10.26      | ns    | 9.66 | -3.87                        |
| TGGT1_271410 | hypothetical protein                            | 2.59       | ns    | 0.24 | -1.1                         |

**Supplementary Table 3.** MetaboAnalyst pathway analysis of polar metabolites from parental vs K13<sup>C627Y</sup> parasites, normalized to mean parental values. Significantly different (FDR < 0.1) pathways are listed. Pathway impact values closer to 1 indicate higher node importance.

| Pathway                                     | Total compounds | Hits | <i>p</i> value | Holm's adjusted <i>p</i> value | FDR       | Impact  |
|---------------------------------------------|-----------------|------|----------------|--------------------------------|-----------|---------|
| Alanine, aspartate and glutamate metabolism | 12              | 6    | 0.00026789     | 0.0075009                      | 0.0075009 | 0.85185 |
| Citrate cycle (TCA cycle)                   | 20              | 7    | 0.0074721      | 0.20922                        | 0.070083  | 0.30607 |
| Glutathione metabolism                      | 21              | 2    | 0.0096666      | 0.261                          | 0.070083  | 0.20313 |
| Porphyrin and chlorophyll metabolism        | 17              | 2    | 0.0096666      | 0.261                          | 0.070083  | 0       |
