# Supplementary material for: Genetic screens reveal a central role for heme metabolism in artemisinin susceptibility
Source: PubMed Central journal article supplement (PMC7511413; doi:10.1038/s41467-020-18624-0), 2020-09-23
Supplement: 41467_2020_18624_MOESM4_ESM.pdf [file 41467_2020_18624_MOESM4_ESM.pdf]

### Description of Additional Supplementary Files

File Name: Supplementary Data 1

Description: Full CRISPR screen data.

File Name: Supplementary Data 2

Description: Raw and normalized data from metabolomics from  $\Delta$ Tmem14c and its parental line

File Name: Supplementary Data 3

Description: **Hits from MAGECK analysis**. All genes significantly (defined as FDR

File Name: Supplementary Data 4

Description: Raw data from untargeted polar metabolomics from parental lines treated with metabolic inhibitors (NaFAc, SA, 2-DG).

File Name: Supplementary Data 5

Description: Protein abundance in TPP samples relative to abundance in the 37° C sample.

File Name: Supplementary Data 6

Description: Raw data from untargeted polar metabolomics from parental and  $\Delta$ DegP2 parasite lines.  $\Delta$

File Name: Supplementary Data 7

Description: *T. gondii* and *P. falciparum* primers used in this study.
